# Supplementary material
Source: publisher figshare collection journal article supplement (https://gsapubs.figshare.com/ndownloader/files/27185078)
Supplement: Supplementary file 1 [file 27185078]

Birkeland, P.W., 1999, Soils and Geomorphology: New York, Oxford University Press, 430 p.

Bevis, M., Hudnut, K., Sanchez, R., Toth, C., Grejner-Brzezinska, D., Kendrick, E., Caccamise, D., Raleigh, D., Zhou, H., Shan, S., Shindle, W., Yong, A., Harvey, J., Borsa, A., Ayoub, F., Shrestha, R., Carter, B., Sartori, M., Phillips, D., and Coloma, F., 2005, The B4 Project: Scanning the San Andreas and San Jacinto Fault Zones: San Francisco, California, 2005 Fall Meeting, American Geophysical Union, 5–9 December, Abstract no. H34B-01.

Dortch, J.M., Owen, L.A., Haneberg, W.C., Caffee, M.W., Dietsch, C., and Kamp, U., 2009, Nature and timing of large landslides in the Himalaya and Transhimalaya of northern India: Quaternary Science Reviews, v. 28, no. 11–12, p. 1037–1054, <https://doi.org/10.1016/j.quascirev.2008.05.002>.

Hallet, B., and Putkonen, J., 1994, Surface dating of dynamic landforms - young boulders on aging moraines: Science, v. 265, no. 5174, p. 937–940, <https://doi.org/10.1126/science.265.5174.937>.

Harden, J.W., 1982, A quantitative index of soil development from field descriptions: Examples from a chronosequence in central California: Geoderma, v. 28, p. 1–28, <https://doi.org/10.1016/0016-7061(82)90037-4>.

Harden, J.W., and Taylor, E.M., 1983, A quantitative comparison of soil development in four climatic regimes: Quaternary Research, v. 20, p. 342–359, <https://doi.org/10.1016/0033-5894(83)90017-0>.

Kendrick, K.J., Partin, C.A., and Graham, R.C., 2016, Granitic boulder erosion caused by chaparral wildfire; implications for cosmogenic radionuclide dating of bedrock surfaces: The Journal of Geology, v. 124, no. 4, p. 529–539, <https://doi.org/10.1086/686273>.

Kohl, C.P., and Nishiizumi, K., 1992, Chemical isolation of quartz for measurement of in-situ-produced cosmogenic nuclides: Geochimica et Cosmochimica Acta, v. 56, no. 9, p. 3583–3587, <https://doi.org/10.1016/0016-7037(92)90401-4>.

Lal, D., 1991, Cosmic ray labeling of erosion surfaces; in situ nuclide production rates and erosion models: Earth and Planetary Science Letters, v. 104, no. 2–4, p. 424–439, <https://doi.org/10.1016/0012-821X(91)90220-C>.

Lifton, N., Sato, T., and Dunai, T.J., 2014, Scaling in situ cosmogenic nuclide production rates using analytical approximations to atmospheric cosmic-ray fluxes: Earth and Planetary Science Letters, v. 386, p. 149–160, <https://doi.org/10.1016/j.epsl.2013.10.052>.

Martin, L.C.P., Blard, P.-H., Balco, G., Lave, J., Delunel, R., Lifton, N., and Laurent, V., 2017, The CREp program and the ICE-D production rate calibration database: A fully parameterizable and updated online tool to compute cosmic ray exposure ages: Quaternary Geochronology, v. 38, p. 25–49, <https://doi.org/10.1016/j.quageo.2016.11.006>.

Miller, F.K., Matti, J.C., and Carson, S.E., 2001, Geologic map of the San Bernardino North 7.5¢ quadrangle, San Bernardino County, California, U.S. Geological Survey Open-File Report 01-131, version 1, scale 1:24,000.

Morton, D.M., and Matti, J.C., 2001, Geologic map of the Devore 7.5-minute quadrangle, San Bernardino County, California: U.S. Geological Survey Open-File Report 01-173, version 1, scale 1:24:000.

Soil Survey Staff, 2010, Keys to Soil Taxonomy (11th ed.): Washington, D.C., U.S. Department of Agriculture, Natural Resources Conservation Service, 338 p.

Stone, J.O., 2000, Air pressure and cosmogenic isotope production: Journal of Geophysical Research, v. 105, p. 23,753–23,759, <https://doi.org/10.1029/2000JB900181>.

Weldon, R.J., II, 1986, Late Cenozoic Geology of Cajon Pass: Implications for tectonics and sedimentation along the San Andreas fault [Ph.D. dissertation]: Pasadena, California, Institute of Technology, 400 p.

Morton, D.M., and Matti, J.C., 2001, Geologic map of the Devore 7.5-minute quadrangle, San Bernardino County, California, U.S. Geological Survey Open-File Report 01-173, version 1, scale 1:24:000.
